# Supplementary material for: Highly crystalline graphite nanofibers as an anode for high-performance potassium-ion batteries
Source: Royal Society of Chemistry journal article supplement (doi:10.1039/d4nj00662c), 2024-01-01
Supplement: d4nj00662c1.pdf [file d4nj00662c1.pdf]

## Supporting Information

### Highly Crystalline Graphite Nanofibers as Anode for High-Performance Potassium-Ion Batteries

Kaixuan Sun,<sup>a,b,c</sup> Kun Chang,<sup>a,b,c</sup> Jinshuo Tan,<sup>a,b,c</sup> Chuan-Fu Sun,<sup>\*b,c</sup> Qin Liu<sup>\*b,c</sup>

a. College of Chemistry, Fuzhou University, Fuzhou, Fujian, 350108, P.R. China.

b. CAS Key Laboratory of Design and Assembly of Functional Nanostructures, and Fujian Key Laboratory of Nanomaterials, Fujian Institute of Research on the Structure of Matter, Chinese Academy of Sciences, Fuzhou, Fujian, 350002, P.R. China.

c. Fujian College University of Chinese Academy of Sciences, Fuzhou, 350002, P.R. China.

\*.Corresponding Authors.

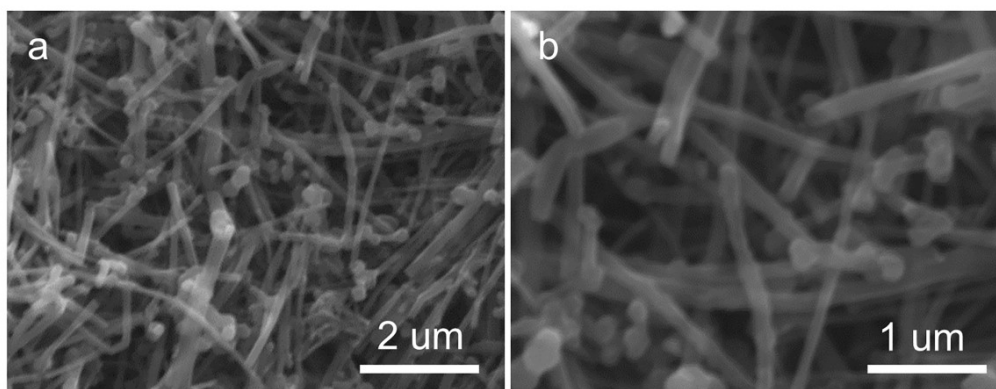

Fig. S1 SEM photos of GNFs electrode.

Tab. S1 Comparison of initial Coulombic efficiency (ICE) of carbon material anode.

| <b>Material</b>                                                 | <b>ICE</b> |
|-----------------------------------------------------------------|------------|
| <b>non-tubular/fibrous carbon</b>                               |            |
| GNT<br>This work                                                | 74.33%     |
| rGO [1]<br>Reduced graphene oxide                               | 74.3%      |
| SC [2]<br>Roft carbon                                           | 72%        |
| Graphite [3]                                                    | 64.8%      |
| OMC [4]<br>ordered mesoporous carbon                            | 63.4%      |
| HCSs [5]<br>hard carbon microspheres                            | 61.8%      |
| SP-HC [6]<br>Sichuan pepper hard carbon                         | 58%        |
| MG [7]<br>modified graphite                                     | 57.7%      |
| MEG [8]<br>mildly-expanded graphite                             | 52.57%     |
| CNC [9]<br>carbon nanocage                                      | 40%        |
| <b>tubular/fibrous carbon</b>                                   |            |
| NCNF [10]<br>hard carbon microspheres                           | 47%        |
| PCM [11]<br>porous carbon microtube                             | 42.6%      |
| CFs [12]<br>Reduced graphene oxide                              | 42.3%      |
| CNTs/MG [13]<br>carbon nanotubes and modified graphite flakes   | 40.7%      |
| CNTs/GCF [14]<br>carbon nanotube modified graphitic carbon foam | 24%        |
| HCNTs [15]<br>hard carbon microspheres                          | 15%        |

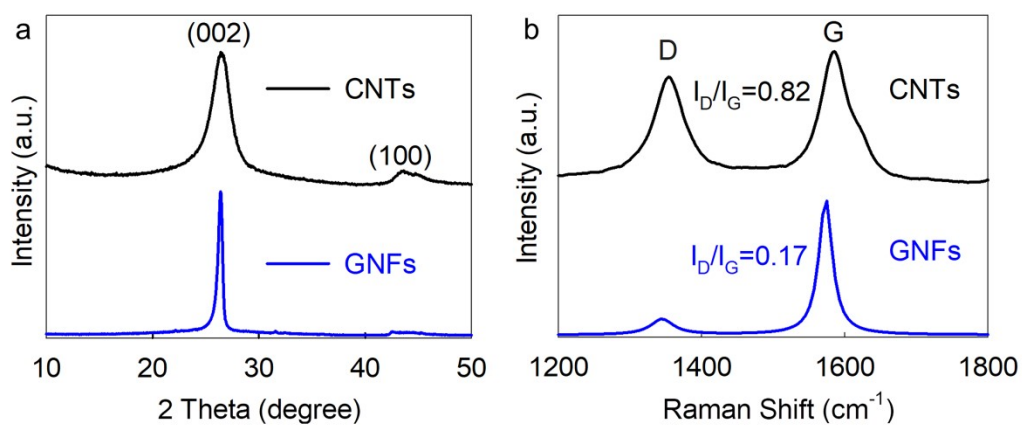

Fig. S2 (a) Comparison of XRD patterns of GNFs and CNTs. (b)

Comparison of Raman spectra of GNFs and CNTs.

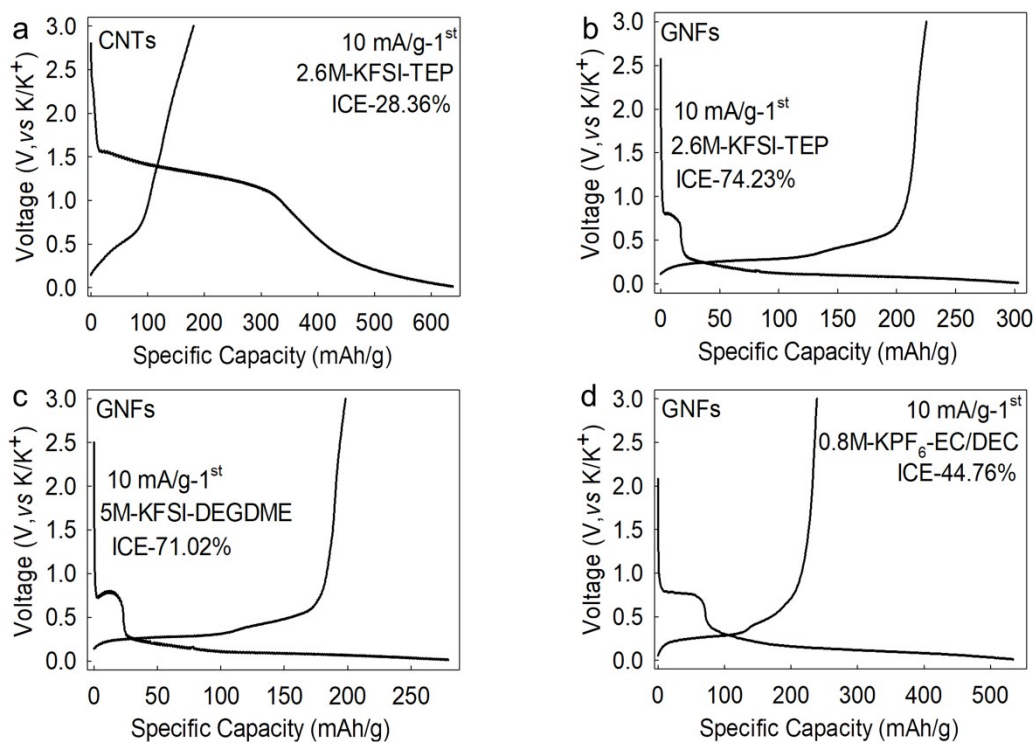

Fig. S3 Initial charge/discharge curves of GNFs and CNTs in different electrolytes. (a) CNTs in 2.6 M-KFSI-TEP electrolyte. GNFs in (b) 2.6 M-KFSI-TEP, (c) 5 M-KFSI-DEGDME, and (d) 0.8 M-KPF<sub>6</sub>-EC/DEC electrolytes.

Tab. S2 Comparison of specific capacity and average discharge voltage of carbon material anode.

| <b>Material</b>                                              | <b>Current density (mA/g)</b> | <b>Specific capacity (mAh/g)</b> | <b>Average voltage(V)</b> |
|--------------------------------------------------------------|-------------------------------|----------------------------------|---------------------------|
| <b>non-tubular/fibrous carbon (without voltage platform)</b> |                               |                                  |                           |
| SP-HC [6]                                                    | 27.9                          | 232                              | 0.35                      |
| GNCs [16]                                                    | 50                            | 280                              | 0.5                       |
| rGO-a [17]                                                   | 93                            | 230                              | 0.5                       |
| N-HPC [18]                                                   | 100                           | 292                              | 0.75                      |
| N-HCNs [19]                                                  | 50                            | 201                              | 0.6                       |
| SC [2]                                                       | 25                            | 194                              | 0.25                      |
| MG [7]                                                       | 200                           | 225                              | 0.8                       |
| a-CB [20]                                                    | 50                            | 170                              | 0.75                      |
| SNHC [21]                                                    | 100                           | 214                              | 0.3                       |
| Graphite [3]                                                 | 93                            | 255                              | 0.2                       |
| MEG [8]                                                      | 100                           | 164                              | 0.3                       |
| TC [22]                                                      | 27.9                          | 155                              | 0.37                      |
| FLNG [23]                                                    | 50                            | 320                              | 0.4                       |
| <b>non tubular/fibrous carbon (with voltage platform)</b>    |                               |                                  |                           |
| CCHC [24]                                                    | 83.7                          | 242                              | 0.4                       |
| HGHS [25]                                                    | 100                           | 264                              | 0.08                      |
| N-FLG [26]                                                   | 100                           | 210                              | 0.1                       |
| <b>tubular/fibrous carbon (without voltage platform)</b>     |                               |                                  |                           |
| CFs [12]                                                     | 100                           | 252.8                            | 0.45                      |
| HCNTs [15]                                                   | 100                           | 232                              | 0.5                       |
| CNTs/MG [13]                                                 | 200                           | 245                              | 0.4                       |
| PCM [11]                                                     | 500                           | 410                              | 0.45                      |
| TWC-SC-G [27]                                                | 30                            | 366                              | 0.45                      |
| NCNF [10]                                                    | 25                            | 248                              | 0.55                      |
| <b>fubular/fibrous carbon ( with voltage platform)</b>       |                               |                                  |                           |
| CNTs/GCF [14]                                                | 100                           | 229                              | 0.3                       |
| GNFs(this work)                                              | 10                            | 252                              | 0.2                       |

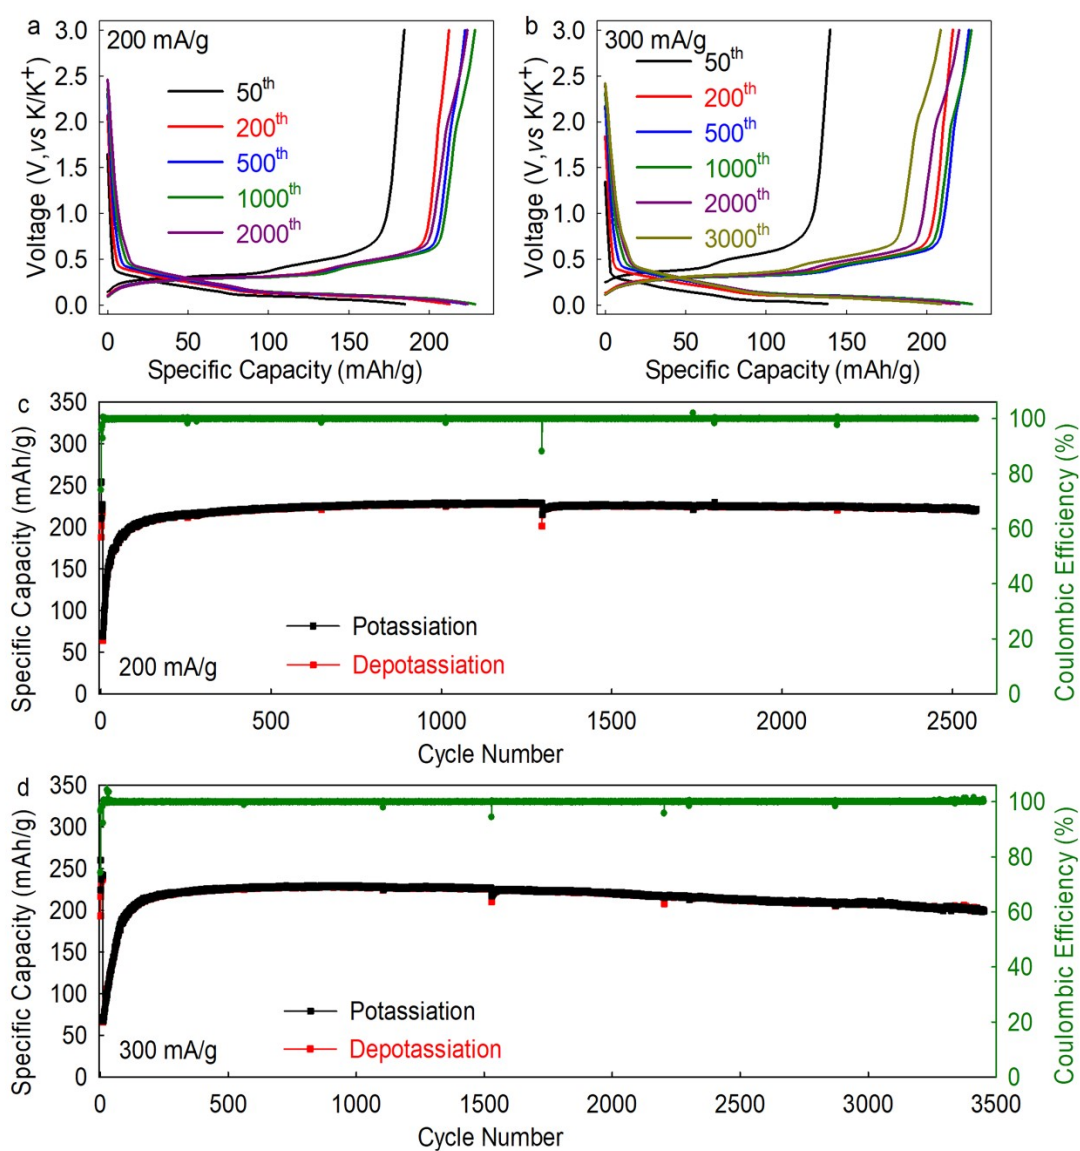

Fig. S4 (a,b) Charge/Discharge curves at 200 mA g<sup>-1</sup> and 300 mA g<sup>-1</sup>. (c,d) Cycle stability curves at 200 mA g<sup>-1</sup> and 300 mA g<sup>-1</sup>.

Tab. S3 Comparison of cycling performance of carbon materials as Anode for potassium-ion batteries.

| <b>Material</b>                   | <b>Current density<br/>(mA/g)</b> | <b>Months</b> | <b>Capacity<br/>Retention</b> |
|-----------------------------------|-----------------------------------|---------------|-------------------------------|
| <b>tubular/fibrous carbon</b>     |                                   |               |                               |
| GNFs                              | 100                               | 12.2          | 99%                           |
| CNTs/GCF[14]                      | 500                               | 1.3           | 96%                           |
| HCNTs[15]                         | 100                               | 3.4           | 90%                           |
| CNT-MG[13]                        | 200                               | 2.1           | 83%                           |
| CFs[12]                           | 100                               | 3.6           | 80%                           |
| CNT/SNCF[28]                      | 5000                              | 0.3           | 80%                           |
| TWC-SC-G[27]                      | 100                               | 1.7           | 77%                           |
| NBCNTs[29]                        | 500                               | 1.2           | 54%                           |
| <b>non tubular/fibrous carbon</b> |                                   |               |                               |
| CCGM[30]                          | 100                               | 2.0           | 99%                           |
| FLNG-ESM[23]                      | 50                                | 1.1           | 91%                           |
| HGHS[15]                          | 200                               | 1.4           | 87%                           |
| GNCs[16]                          | 50                                | 3.3           | 82%                           |
| rGO-a[17]                         | 93                                | 0.8           | 78%                           |
| SC[2]                             | 25                                | 2.5           | 75%                           |
| SNHC[21]                          | 100                               | 3.4           | 73%                           |
| MEG[8]                            | 100                               | 1.1           | 72%                           |
| N-HCNs[19]                        | 50                                | 1.2           | 68%                           |
| N-FLG[26]                         | 100                               | 0.7           | 65%                           |
| N-HPC[18]                         | 100                               | 3.4           | 54%                           |

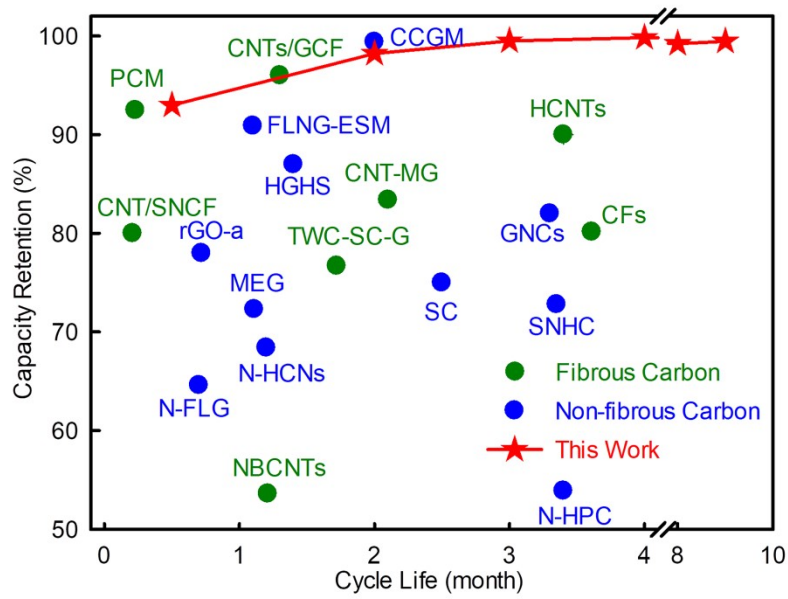

Fig. S5 Comparison of cycle stability of carbon material anode.

Tab. S4 Value of  $R_s$  (represent electrolyte resistance),  $R_f$  (contact resistance of solid electrolyte interphase),  $R_{ct}$  (contact resistance of solid electrolyte interphase).

|                   | Initial | After 3 cycles |
|-------------------|---------|----------------|
| $R_s (\Omega)$    | 18.91   | 26.93          |
| $R_f (\Omega)$    | -       | 1520           |
| $R_{ct} (\Omega)$ | 5986    | 2878           |



## References

- [1] Y. Chen, L. Qin, Y. Lei, X. Li, J. Dong, D. Zhai, B. Li, F. Kang, Correlation between microstructure and potassium storage behavior in reduced graphene oxide materials, *ACS Applied Materials & Interfaces*, 11 (2019) 45578-45585.
- [2] H. Tan, R. Zhou, B. Zhang, Understanding potassium ion storage mechanism in pitch-derived soft carbon and the consequence on cyclic stability, *Journal of Power Sources*, 506 (2021) 230179-230187.
- [3] L. Fan, R. Ma, Q. Zhang, X. Jia, B. Lu, Graphite anode for a potassium-ion battery with unprecedented performance, *angewandte chemie international edition*, 58 (2019) 10500-10505.
- [4] W. Wang, J. Zhou, Z. Wang, L. Zhao, P. Li, Y. Yang, C. Yang, H. Huang, S. Guo, Short-range order in mesoporous carbon boosts potassium-ion battery performance, *Advanced Energy Materials*, 8 (2017) 1701648.
- [5] Z. Jian, Z. Xing, C. Bommier, Z. Li, X. Ji, Hard carbon microspheres: potassium-ion anode versus sodium-ion anode, *Advanced Energy Materials*, 6 (2015) 100.
- [6] C. Chen, M. Wu, Y. Wang, K. Zaghib, Insights into pseudographite-structured hard carbon with stabilized performance for high energy K-ion storage, *Journal of Power Sources*, 444 (2019) 227310-227317.
- [7] F. Yuan, Y. Lei, H. Wang, X. Li, J. Hu, Y. Wei, R. Zhao, B. Li, F. Kang, D. Zhai, Pseudo-capacitance reinforced modified graphite for fast-charging potassium-ion batteries, *Carbon*, 185 (2021) 48-56.
- [8] X. Li, Y. Lei, L. Qin, D. Han, H. Wang, D. Zhai, B. Li, F. Kang, Mildly-expanded graphite with adjustable interlayer distance as high-performance anode for potassium-ion batteries, *Carbon*, 172 (2021) 200-206.
- [9] B. Cao, Q. Zhang, H. Liu, B. Xu, S. Zhang, T. Zhou, J. Mao, W.K. Pang, Z. Guo, A. Li, J. Zhou, X. Chen, H. Song, Graphitic carbon nanocage as a stable and high power anode for potassium-ion batteries, *Advanced Energy Materials*, 8 (2018) 1801149.
- [10] Y. Xu, C. Zhang, M. Zhou, Q. Fu, C. Zhao, M. Wu, Y. Lei, Highly nitrogen doped carbon nanofibers with superior rate capability and cyclability for potassium ion batteries, *Nature Communications*, 9 (2018) 1720.
- [11] B. Wang, F. Yuan, W. Wang, D. Zhang, H. Sun, K. Xi, D. Wang, J. Chu, Q. Wang, W. Li, A carbon microtube array with a multihole cross profile: releasing the stress and boosting long-cycling and high-rate potassium ion storage, *Journal of Materials Chemistry A*, 7 (2019) 25845-25852.
- [12] Z. Yi, S. Jiang, Y. Qian, J. Tian, N. Lin, Y. Qian, Edge-plane exposed N-doped carbon nanofibers toward fast K-ion adsorption/diffusion kinetics for K-ion capacitors, *CCS Chemistry*, 2 (2020) 495-506.
- [13] S. Jiang, Y. Li, Y. Qian, J. Zhou, T. Li, N. Lin, Y. Qian, Constructing a buffering and conducting carbon nanotubes-interweaved layer on graphite flakes for high-rate and long-term K-storage properties, *Journal of Power Sources*, 436 (2019) 226847.
- [14] S. Zeng, X. Zhou, B. Wang, Y. Feng, R. Xu, H. Zhang, S. Peng, Y. Yu, Freestanding CNT-modified graphitic carbon foam as a flexible anode for potassium ion batteries, *Journal of Materials Chemistry A*, 7 (2019) 15774-15781.
- [15] Y. Wang, Z. Wang, Y. Chen, H. Zhang, M. Yousaf, H. Wu, M. Zou, A. Cao, R.P.S. Han, Hyperporous sponge interconnected by hierarchical carbon nanotubes as a high-performance potassium-ion battery anode, *Advanced Materials*, 30 (2018) 1802074.
- [16] W. Zhang, J. Ming, W. Zhao, X. Dong, M.N. Hedhili, P.M.F.J. Costa, H.N. Alshareef, Graphitic

nanocarbon with engineered defects for high-performance potassium-ion battery anodes, *Advanced Functional Materials*, 29 (2019) 1903641.

[17] L. Liu, Z. Lin, J.-Y. Chane-Ching, H. Shao, P.-L. Taberna, P. Simon, 3D rGO aerogel with superior electrochemical performance for K-ion battery, *Energy Storage Materials*, 19 (2019) 306-313.

[18] X. Zhou, L. Chen, W. Zhang, J. Wang, Z. Liu, S. Zeng, R. Xu, Y. Wu, S. Ye, Y. Feng, X. Cheng, Z. Peng, X. Li, Y. Yu, Three-dimensional ordered macroporous metal-organic framework single crystal-derived nitrogen-doped hierarchical porous carbon for high-performance potassium-ion Batteries, *Nano Letters*, 19 (2019) 4965-4973.

[19] J. Ruan, X. Wu, Y. Wang, S. Zheng, D. Sun, Y. Song, M. Chen, Nitrogen-doped hollow carbon nanospheres towards the application of potassium ion storage, *Journal of Materials Chemistry A*, 7 (2019) 19305-19315.

[20] K.-H. Nam, V. Ganesan, K.H. Chae, C.-M. Park, High-performance carbon by amorphization and prepotassiation for potassium-ion battery anodes, *Carbon*, 181 (2021) 290-299.

[21] Y. Liu, H. Dai, L. Wu, W. Zhou, L. He, W. Wang, W. Yan, Q. Huang, L. Fu, Y. Wu, A large scalable and low-cost sulfur/nitrogen dual-doped hard carbon as the negative electrode material for high-performance potassium-ion batteries, *Advanced Energy Materials*, 9 (2019) 1901379.

[22] Y. Li, R.A. Adams, A. Arora, V.G. Pol, A.M. Levine, R.J. Lee, K. Akato, A.K. Naskar, M.P. Paranthaman, Sustainable potassium-ion battery anodes derived from waste-tire rubber, *Journal of The Electrochemical Society*, 164 (2017) A1234-A1238.

[23] Z.C. Ju, P.Z. Li, G.Y. Ma, Z. Xing, Q.C. Zhuang, Y.T. Qian, Few layer nitrogen-doped graphene with highly reversible potassium storage, *Energy Storage Materials*, 11 (2018) 38-46.

[24] H. Dai, Z. Zeng, X. Yang, M. Jiang, Y. Wang, Q. Huang, L. Liu, L. Fu, P. Zhang, Y. Wu, Superior potassium storage behavior of hard carbon facilitated by ether-based electrolyte, *Carbon*, 179 (2021) 60-67.

[25] Q. Pan, S. Liu, Y. Yang, G. Ye, X. Tang, J. Wang, Insight into highly graphitic hollow spheres for superior potassium ion batteries, *Advanced Materials Technologies*, 8 (2023) 2202187.

[26] K. Share, A.P. Cohn, R. Carter, B. Rogers, C.L. Pint, Role of nitrogen-doped graphene for improved high-capacity potassium ion battery anodes, *ACS Nano*, 10 (2016) 9738-9744.

[27] Z. Tang, Y. Wang, Z. Zheng, X. Luo, In situ dual growth of graphitic structures in biomass carbon to yield a potassium-ion battery anode with high initial coulombic efficiency, *Journal of Materials Chemistry A*, 9 (2021) 9191-9202.

[28] D. Chen, Z. Huang, S. Sun, H. Zhang, W. Wang, G. Yu, J. Chen, A flexible multi-channel hollow CNT/Carbon nanofiber composites with S/N co-doping for sodium/potassium ion energy storage, *ACS Applied Materials & Interfaces*, 13 (2021) 44369-44378.

[29] Y. Liu, C. Yang, Q. Pan, Y. Li, G. Wang, X. Ou, F. Zheng, X. Xiong, M. Liu, Q. Zhang, Nitrogen-doped bamboo-like carbon nanotubes as anode material for high performance potassium ion batteries, *Journal of Materials Chemistry A*, 6 (2018) 15162-15169.

[30] Z. Liu, J. Wang, X. Jia, W. Li, Q. Zhang, L. Fan, H. Ding, H. Yang, X. Yu, X. Li, B. Lu, Graphene armored with a crystal carbon shell for ultrahigh-performance potassium ion batteries and aluminum batteries, *ACS Nano*, 13 (2019) 10631-10642.
